# Supplementary material for: Integrated vegetation management within electrical transmission landscapes promotes floral resource and flower-visiting insect diversity
Source: PubMed Central journal article supplement (PMC11338444; doi:10.1371/journal.pone.0308263), 2024-08-21
Supplement: pone.0308263.s004.pdf [file pone.0308263.s004.pdf]

# **Integrated vegetation management within electrical transmission landscapes promotes floral resource and flower-visiting insect diversity**

Chase B. Kimmel<sup>1\*</sup>, Ivone de Bem Oliveira<sup>1</sup>, Joshua W. Campbell<sup>1,2</sup>, Emily Khazan<sup>1</sup>, Jonathan S. Bremer<sup>1,3</sup>, Kristin Rossetti<sup>1</sup>, Matthew Standridge<sup>1</sup>, Tyler J. Shaw<sup>1</sup>, Samm Epstein<sup>1</sup>, Alexandra Tsalickis<sup>1,4</sup>, and Jaret C. Daniels<sup>1,5</sup>

<sup>1</sup> McGuire Center for Lepidoptera and Biodiversity, Florida Museum of Natural History, University of Florida, Gainesville, Florida, United States of America

<sup>2</sup> United States Department of Agriculture Agricultural Research Service Northern Plains Agricultural Research Laboratory, Sidney, Montana, United States of America

<sup>3</sup> Florida Department of Agriculture and Consumer Services, Division of Plant Industry, Entomology Section, Gainesville, Florida, United States of America

<sup>4</sup> Department of Geosciences, Auburn University, Auburn, Alabama, United States of America

<sup>5</sup> Department of Entomology and Nematology, University of Florida, Gainesville, Florida, United States of America

\* Corresponding author  
E-mail: cbkimmel@ufl.edu (CBK)

**S1 Table. Blooming plant inventory and phenology.** Detailed overview for plant inventory (S = Spring, ES = Early-Summer, LS = Late-Summer, and F = Fall) over the duration of the project. Duration and growth habit were determined using the USDA plant database [61]. Native and endemic status data was collected from the Atlas of Florida (AFP) plant database [28]. Potential new county records were determined using AFP. If the given species did not have a voucher listed for the county in which it was found, it was indicated as a potential new voucher record. In some situations, a given plant was unable to be identified to species. In these instances, each species within the respective genus was investigated to determine native, endemic, and potential new county record status. If the designation was consistent across all species, a designation was determined. However, if there were differences between different species within the genus, an NA was used to denote that no determination could be found. An asterisk indicates multiple varieties of this species are listed on AFP and specific county records could not be ascertained.

| Scientific Name                | Family        | Duration                  | Growth Habit | Native | Florida Endemic | New County Record | Bloom Phenology |    |    |   |
|--------------------------------|---------------|---------------------------|--------------|--------|-----------------|-------------------|-----------------|----|----|---|
|                                |               |                           |              |        |                 |                   | S               | ES | LS | F |
| <i>Agalinis fasciculata</i>    | Orobanchaceae | Annual                    | Forb/herb    | Y      | N               |                   |                 |    |    | X |
| <i>Asclepias tuberosa</i>      | Apocynaceae   | Perennial                 | Forb/herb    | Y      | N               |                   |                 |    | X  |   |
| <i>Asemeia violacea</i>        | Polygalaceae  | Annual                    | Forb/herb    | Y      | N               |                   |                 |    | X  | X |
| <i>Asimina angustifolia</i>    | Annonaceae    | Perennial                 | Shrub        | Y      | N               |                   | X               |    |    |   |
| <i>Baccharis halimifolia</i>   | Asteraceae    | Perennial                 | Shrub/Tree   | Y      | N               |                   |                 |    |    | X |
| <i>Balduina angustifolia</i>   | Asteraceae    | Annual/Biennial/Perennial | Forb/herb    | Y      | N               |                   |                 |    |    | X |
| <i>Baptisia lecontei</i>       | Fabaceae      | Perennial                 | Forb/herb    | Y      | N               |                   |                 | X  |    |   |
| <i>Berlandiera subacaulis</i>  | Asteraceae    | Perennial                 | Forb/herb    | Y      | Y               |                   | X               | X  | X  |   |
| <i>Bidens alba</i>             | Asteraceae    | Annual/Perennial          | Forb/herb    | Y      | N               |                   |                 | X  | X  | X |
| <i>Boerhavia diffusa</i>       | Nyctaginaceae | Annual/Perennial          | Forb/herb    | Y      | N               |                   |                 |    | X  |   |
| <i>Callicarpa americana</i>    | Lamiaceae     | Perennial                 | Shrub        | Y      | N               |                   |                 | X  | X  |   |
| <i>Cantinoa mutabilis</i>      | Lamiaceae     | Perennial                 | Forb/herb    | N      | N               | Gilchrist         |                 | X  | X  | X |
| <i>Carphephorus</i> sp.        | Asteraceae    | Perennial                 | Forb/herb    | Y      | NA              | NA                |                 |    |    | X |
| <i>Carphephorus corymbosus</i> | Asteraceae    | Perennial                 | Forb/herb    | Y      | N               |                   |                 |    |    | X |

|                                  |               |                 |                    |   |   |                     |  |   |   |     |
|----------------------------------|---------------|-----------------|--------------------|---|---|---------------------|--|---|---|-----|
| <i>Carphephorus paniculatus</i>  | Asteraceae    | Perennial       | Forb/herb          | Y | N |                     |  |   |   | X   |
| <i>Centella asiatica</i>         | Apiaceae      | Perennial       | Forb/herb/Subshrub | Y | N |                     |  | X |   |     |
| <i>Chaerophyllum tainturieri</i> | Apiaceae      | Annual          | Forb/herb          | Y | N |                     |  | X | X |     |
| <i>Chamaecrista fasciculata</i>  | Fabaceae      | Annual          | Forb/herb          | Y | N |                     |  |   |   | X X |
| <i>Chrysopsis mariana</i>        | Asteraceae    | Perennial       | Forb/herb          | Y | N |                     |  |   |   | X X |
| <i>Chrysopsis scabrella</i>      | Asteraceae    | Annual          | Forb/herb          | Y | N | Gilchrist, Suwannee |  |   |   | X   |
| <i>Chrysopsis subulata</i>       | Asteraceae    | Perennial       | Forb/herb          | Y | Y | Gilchrist           |  |   |   | X   |
| <i>Clitoria mariana</i>          | Fabaceae      | Perennial       | Forb/herb/Vine     | Y | N |                     |  | X | X |     |
| <i>Cnidioscolus stimulosus</i>   | Euphorbiaceae | Perennial       | Forb/herb          | Y | N |                     |  | X | X | X X |
| <i>Commelina erecta</i>          | Commelinaceae | Perennial       | Forb/herb          | Y | N |                     |  | X | X | X   |
| <i>Condea verticillata</i>       | Lamiaceae     | Perennial       | Forb/herb/Subshrub | N | N | Gilchrist           |  |   |   | X   |
| <i>Conyza canadensis</i>         | Asteraceae    | Annual/Biennial | Forb/herb          | Y | N |                     |  |   |   | X X |
| <i>Coreopsis basalis</i>         | Asteraceae    | Annual          | Forb/herb          | N | N |                     |  | X | X |     |
| <i>Coreopsis lanceolata</i>      | Asteraceae    | Perennial       | Forb/herb          | Y | N | Columbia, Gilchrist |  | X |   | X   |
| <i>Coreopsis leavenworthii</i>   | Asteraceae    | Perennial       | Forb/herb          | Y | N |                     |  | X | X | X   |
| <i>Corydalis micrantha</i>       | Papaveraceae  | Annual          | Forb/herb          | Y | N |                     |  | X |   |     |
| <i>Crataegus</i> sp.             | Rosaceae      | Perennial       | Shrub/Tree         | Y | N | NA                  |  | X |   |     |
| <i>Crocanthemum corymbosum</i>   | Cistaceae     | Perennial       | Forb/herb/Subshrub | Y | N |                     |  | X | X | X   |
| <i>Crocanthemum georgianum</i>   | Cistaceae     | Perennial       | Forb/herb/Subshrub | Y | N |                     |  | X |   |     |
| <i>Croptilon divaricatum</i>     | Asteraceae    | Annual          | Forb/herb          | Y | N |                     |  |   |   | X   |
| <i>Crotalaria lanceolata</i>     | Fabaceae      | Annual          | Forb/herb          | N | N |                     |  |   |   | X   |
| <i>Crotalaria pallida</i>        | Fabaceae      | Perennial       | Forb/herb/Subshrub | N | N | Gilchrist           |  |   |   | X   |
| <i>Crotalaria rotundifolia</i>   | Fabaceae      | Perennial       | Forb/herb          | Y | N |                     |  | X |   |     |
| <i>Crotalaria spectabilis</i>    | Fabaceae      | Annual          | Forb/herb          | N | N |                     |  |   |   | X   |

|                                  |                |                           |                    |   |   |           |   |   |   |
|----------------------------------|----------------|---------------------------|--------------------|---|---|-----------|---|---|---|
| <i>Croton argyranthemus</i>      | Euphorbiaceae  | Perennial                 | Forb/herb/Subshrub | Y | N |           | X | X |   |
| <i>Croton glandulosus</i>        | Euphorbiaceae  | Annual                    | Forb/herb/Subshrub | Y | N |           | X | X | X |
| <i>Croton michauxii</i>          | Euphorbiaceae  | Annual                    | Forb/herb          | Y | N |           | X | X | X |
| <i>Cyclospermum leptophyllum</i> | Apiaceae       | Annual                    | Forb/herb          | N | N | Gilchrist | X |   |   |
| <i>Descurainia pinnata</i>       | Brassicaceae   | Annual/Biennial/Perennial | Forb/herb          | Y | N |           | X |   |   |
| <i>Desmodium strictum</i>        | Fabaceae       | Perennial                 | Forb/herb          | Y | N | Gilchrist |   |   | X |
| <i>Desmodium triflorum</i>       | Fabaceae       | Perennial                 | Forb/herb          | N | N |           |   |   | X |
| <i>Diodia virginiana</i>         | Rubiaceae      | Annual/Perennial          | Forb/herb/Subshrub | Y | N |           | X | X | X |
| <i>Distimake dissectus</i>       | Convolvulaceae | Perennial                 | Forb/herb/Vine     | Y | N | Gilchrist | X | X | X |
| <i>Drosera capillaris</i>        | Droseraceae    | Perennial                 | Forb/herb          | Y | N |           | X |   |   |
| <i>Edrastima uniflora</i>        | Rubiaceae      | Annual                    | Forb/herb/Subshrub | Y | N |           |   | X | X |
| <i>Elephantopus elatus</i>       | Asteraceae     | Perennial                 | Forb/herb          | Y | N |           |   |   | X |
| <i>Erechtites hieraciifolius</i> | Asteraceae     | Annual                    | Forb/herb          | Y | N |           |   | X |   |
| <i>Erigeron quercifolius</i>     | Asteraceae     | Annual                    | Forb/herb          | Y | N |           | X |   |   |
| <i>Erigeron strigosus</i>        | Asteraceae     | Annual/Biennial/Perennial | Forb/herb          | Y | N |           | X | X | X |
| <i>Eriogonum tomentosum</i>      | Polygonaceae   | Perennial                 | Forb/herb          | Y | N |           |   | X |   |
| <i>Eryngium aquaticum</i>        | Apiaceae       | Biennial                  | Forb/herb          | Y | N | Gilchrist | X |   |   |
| <i>Eryngium aromaticum</i>       | Apiaceae       | Perennial                 | Forb/herb          | Y | N |           |   | X |   |
| <i>Eryngium baldwinii</i>        | Apiaceae       | Biennial/Perennial        | Forb/herb          | Y | N |           | X |   |   |
| <i>Euphorbia cyathophora</i>     | Euphorbiaceae  | Annual/Perennial          | Forb/herb          | Y | N | Gilchrist | X | X | X |
| <i>Euphorbia heterophylla</i>    | Euphorbiaceae  | Annual/Perennial          | Forb/herb          | Y | N | Gilchrist |   | X | X |
| <i>Euthamia caroliniana</i>      | Asteraceae     | Perennial                 | Forb/herb          | Y | N |           |   |   | X |
| <i>Froelichia floridana</i>      | Amaranthaceae  | Annual                    | Forb/herb          | Y | N |           | X | X | X |
| <i>Galactia mollis</i>           | Fabaceae       | Perennial                 | Forb/herb/Vine     | Y | N |           |   | X |   |

|                                 |                  |                  |                    |   |    |           |   |   |   |   |
|---------------------------------|------------------|------------------|--------------------|---|----|-----------|---|---|---|---|
| <i>Galactia</i> sp.             | Fabaceae         | Perennial        | Forb/herb/Vine     | Y | NA | NA        |   | X | X |   |
| <i>Galium aparine</i>           | Rubiaceae        | Annual           | Forb/herb/Vine     | Y | N  |           | X |   |   | X |
| <i>Galium tinctorium</i>        | Rubiaceae        | Perennial        | Forb/herb          | Y | N  | Gilchrist |   | X |   | X |
| <i>Gelsemium sempervirens</i>   | Gelsemiaceae     | Perennial        | Shrub/Vine         | Y | N  |           | X |   |   |   |
| <i>Geobalanus oblongifolius</i> | Chrysobalanaceae | Perennial        | Shrub/Subshrub     | Y | N  |           |   | X |   |   |
| <i>Geranium carolinianum</i>    | Geraniaceae      | Annual/Biennial  | Forb/herb          | Y | N  |           | X | X |   |   |
| <i>Glandularia aristigera</i>   | Verbenaceae      | Annual/Perennial | Forb/herb/Subshrub | N | N  |           | X | X | X |   |
| <i>Helianthus angustifolius</i> | Asteraceae       | Perennial        | Forb/herb          | Y | N  | Gilchrist |   |   |   | X |
| <i>Heterotheca subaxillaris</i> | Asteraceae       | Annual           | Forb/herb          | Y | N  |           |   |   |   | X |
| <i>Hexasepalum teres</i>        | Rubiaceae        | Annual/Perennial | Forb/herb          | Y | N  |           |   |   | X | X |
| <i>Hieracium gronovii</i>       | Asteraceae       | Perennial        | Forb/herb          | Y | N  |           |   |   | X |   |
| <i>Hieracium megacephalon</i>   | Asteraceae       | Perennial        | Forb/herb          | Y | N  | Gilchrist | X | X |   |   |
| <i>Houstonia procumbens</i>     | Rubiaceae        | Perennial        | Forb/herb          | Y | N  |           | X |   |   |   |
| <i>Hydrocotyle umbellata</i>    | Araliaceae       | Perennial        | Forb/herb          | Y | N  |           |   | X | X | X |
| <i>Hymenopappus scabiosaeus</i> | Asteraceae       | Biennial         | Forb/herb          | Y | N  |           |   | X |   |   |
| <i>Hypericum gentianoides</i>   | Clusiaceae       | Annual           | Forb/herb          | Y | N  |           |   |   | X | X |
| <i>Hypericum hypericoides</i>   | Clusiaceae       | Perennial        | Shrub/Subshrub     | Y | N  |           |   |   | X | X |
| <i>Hypericum myrtifolium</i>    | Clusiaceae       | Perennial        | Shrub/Subshrub     | Y | N  |           | X |   |   | X |
| <i>Hypericum tetrapetalum</i>   | Clusiaceae       | Perennial        | Shrub/Subshrub     | Y | N  |           | X | X | X |   |
| <i>Ilex glabra</i>              | Aquifoliaceae    | Perennial        | Shrub              | Y | N  |           | X |   |   |   |
| <i>Indigofera hirsuta</i>       | Fabaceae         | Annual           | Forb/herb/Subshrub | N | N  |           |   |   |   | X |
| <i>Indigofera spicata</i>       | Fabaceae         | Annual/Perennial | Forb/herb          | N | N  |           |   |   |   | X |
| <i>Ipomoea hederacea</i>        | Convolvulaceae   | Annual           | Forb/herb/Vine     | N | N  | Gilchrist |   |   |   | X |
| <i>Ipomoea hederifolia</i>      | Convolvulaceae   | Annual           | Forb/herb/Vine     | Y | N  |           |   |   | X | X |

|                                  |                |                           |                    |   |    |                     |   |   |     |
|----------------------------------|----------------|---------------------------|--------------------|---|----|---------------------|---|---|-----|
| <i>Ipomopsis rubra</i>           | Polemoniaceae  | Biennial                  | Forb/herb          | Y | N  |                     |   |   | X   |
| <i>Juncus marginatus</i>         | Juncaceae      | Perennial                 | Graminoid          | Y | N  |                     |   |   | X   |
| <i>Kalmia hirsuta</i>            | Ericaceae      | Perennial                 | Shrub              | Y | N  |                     |   |   | X   |
| <i>Krigia cespitosa</i>          | Asteraceae     | Annual                    | Forb/herb          | Y | N  |                     |   |   | X   |
| <i>Lachnanthes caroliana</i>     | Haemodoraceae  | Perennial                 | Forb/herb          | Y | N  |                     |   |   | X   |
| <i>Lachnocaulon beyrichianum</i> | Eriocaulaceae  | Perennial                 | Forb/herb          | Y | N  | Gilchrist           | X | X | X   |
| <i>Lactuca graminifolia</i>      | Asteraceae     | Biennial/Perennial        | Forb/herb          | Y | N  |                     | X | X |     |
| <i>Lechea deckertii</i>          | Cistaceae      | Perennial                 | Forb/herb/Subshrub | Y | N  | Gilchrist, Suwannee |   |   | X   |
| <i>Lepidium virginicum</i>       | Brassicaceae   | Annual/Biennial/Perennial | Forb/herb          | Y | N  |                     | X | X | X   |
| <i>Liatris gracilis</i>          | Asteraceae     | Perennial                 | Forb/herb          | Y | N  |                     |   |   | X   |
| <i>Liatris</i> sp.               | Asteraceae     | Perennial                 | Forb/herb          | Y | NA | NA                  |   |   | X   |
| <i>Liatris tenuifolia</i>        | Asteraceae     | Perennial                 | Forb/herb          | Y | N  | Columbia            |   |   | X   |
| <i>Linum floridanum</i>          | Linaceae       | Perennial                 | Forb/herb          | Y | N  | Gilchrist, Suwannee |   |   | X X |
| <i>Lonicera sempervirens</i>     | Caprifoliaceae | Perennial                 | Vine               | Y | N  | Gilchrist           | X | X |     |
| <i>Lythrum alatum</i>            | Lythraceae     | Perennial                 | Forb/herb/Subshrub | Y | N  | Gilchrist           |   |   | X   |
| <i>Mecardonia procumbens</i>     | Plantaginaceae | Annual/Perennial          | Forb/herb          | Y | N  | Levy                |   |   | X   |
| <i>Medicago lupulina</i>         | Fabaceae       | Annual/Perennial          | Forb/herb          | N | N  |                     | X | X |     |
| <i>Melothria pendula</i>         | Cucurbitaceae  | Perennial                 | Forb/herb/Vine     | Y | N  |                     |   |   | X X |
| <i>Mimosa quadrivalvis</i>       | Fabaceae       | Perennial                 | Forb/herb/Vine     | Y | N  | *                   |   | X |     |
| <i>Mimosa strigillosa</i>        | Fabaceae       | Perennial                 | Forb/herb/Subshrub | Y | N  |                     |   | X |     |
| <i>Mollugo verticillata</i>      | Molluginaceae  | Annual                    | Forb/herb          | N | N  | Gilchrist           |   |   | X   |
| <i>Monarda punctata</i>          | Lamiaceae      | Annual/Biennial/Perennial | Forb/herb/Subshrub | Y | N  | Suwannee            |   |   | X   |
| <i>Oenothera biennis</i>         | Onagraceae     | Biennial                  | Forb/herb          | Y | N  | Suwannee            |   |   | X   |
| <i>Oenothera laciniata</i>       | Onagraceae     | Annual/Perennial          | Forb/herb          | Y | N  |                     | X | X |     |

|                               |                  |                  |                    |   |   |           |   |   |   |   |
|-------------------------------|------------------|------------------|--------------------|---|---|-----------|---|---|---|---|
| <i>Oenothera simulans</i>     | Onagraceae       | Annual           | Forb/herb          | Y | N |           |   | X | X | X |
| <i>Oenothera speciosa</i>     | Onagraceae       | Perennial        | Forb/herb/Subshrub | N | N | Gilchrist |   |   | X |   |
| <i>Opuntia austrina</i>       | Cactaceae        | Perennial        | Shrub              | Y | N | Columbia  |   | X |   |   |
| <i>Oxalis corniculata</i>     | Oxalidaceae      | Annual/Perennial | Forb/herb          | Y | N |           | X | X | X | X |
| <i>Packera glabella</i>       | Asteraceae       | Annual           | Forb/herb          | Y | N |           | X |   |   |   |
| <i>Palafoxia integrifolia</i> | Asteraceae       | Annual           | Forb/herb          | Y | N |           |   |   |   | X |
| <i>Paronychia patula</i>      | Caryophyllaceae  | Annual           | Forb/herb          | Y | N |           |   |   |   | X |
| <i>Paronychia rugelii</i>     | Caryophyllaceae  | Annual           | Forb/herb          | Y | N | Columbia  |   |   | X | X |
| <i>Passiflora incarnata</i>   | Passifloraceae   | Perennial        | Forb/herb/Vine     | Y | N |           |   |   | X |   |
| <i>Pectis prostrata</i>       | Asteraceae       | Annual           | Forb/herb          | Y | N | Gilchrist |   | X |   |   |
| <i>Penstemon multiflorus</i>  | Plantaginaceae   | Perennial        | Forb/herb          | Y | N |           |   | X | X |   |
| <i>Pentodon pentandrus</i>    | Rubiaceae        | Annual           | Forb/herb          | Y | N | Gilchrist |   |   |   | X |
| <i>Phlox drummondii</i>       | Polemoniaceae    | Annual           | Forb/herb          | N | N |           | X | X | X |   |
| <i>Phlox floridana</i>        | Polemoniaceae    | Perennial        | Forb/herb          | Y | N |           |   | X |   |   |
| <i>Phyla nodiflora</i>        | Verbenaceae      | Perennial        | Forb/herb          | Y | N |           |   | X | X |   |
| <i>Physalis arenicola</i>     | Solanaceae       | Perennial        | Forb/herb          | Y | N | Gilchrist | X | X |   |   |
| <i>Pinguicula pumila</i>      | Lentibulariaceae | Annual/Perennial | Forb/herb          | Y | N |           | X |   |   |   |
| <i>Piriqueta cistoides</i>    | Turneraceae      | Annual/Perennial | Forb/herb/Subshrub | Y | N |           | X | X | X | X |
| <i>Pityopsis graminifolia</i> | Asteraceae       | Perennial        | Forb/herb          | Y | N |           |   |   |   | X |
| <i>Plantago virginica</i>     | Plantaginaceae   | Annual/Biennial  | Forb/herb          | Y | N |           | X |   |   |   |
| <i>Polygala incarnata</i>     | Polygalaceae     | Annual           | Forb/herb          | Y | N | Gilchrist |   |   | X |   |
| <i>Polygala nana</i>          | Polygalaceae     | Annual           | Forb/herb          | Y | N |           | X | X | X | X |
| <i>Polygonum nesomii</i>      | Polygonaceae     | Perennial        | Subshrub           | Y | Y | Columbia  |   |   |   | X |
| <i>Polygonum pinicola</i>     | Polygonaceae     | Annual           | Forb/herb/Subshrub | Y | N | Columbia  |   |   |   | X |

|                                  |                  |                           |                         |   |   |                     |   |   |   |
|----------------------------------|------------------|---------------------------|-------------------------|---|---|---------------------|---|---|---|
| <i>Polypremum procumbens</i>     | Tetrachondraceae | Annual/Perennial          | Forb/herb               | Y | N |                     |   | X | X |
| <i>Prunus serotina</i>           | Rosaceae         | Perennial                 | Shrub/Tree              | Y | N |                     | X |   |   |
| <i>Prunus umbellata</i>          | Rosaceae         | Perennial                 | Shrub/Tree              | Y | N |                     | X |   |   |
| <i>Pseudognaphalium</i>          | Asteraceae       | Annual/Biennial           | Forb/herb               | Y | N |                     |   |   | X |
| <i>Pterocaulon pycnostachyum</i> | Asteraceae       | Perennial                 | Forb/herb/Subshrub      | Y | N |                     |   | X | X |
| <i>Ptilimnium capillaceum</i>    | Apiaceae         | Annual                    | Forb/herb               | Y | N | Gilchrist           | X | X |   |
| <i>Rhexia mariana</i>            | Melastomataceae  | Perennial                 | Forb/herb               | Y | N |                     |   |   | X |
| <i>Rhus copallinum</i>           | Anacardiaceae    | Perennial                 | Shrub/Tree              | Y | N |                     |   |   | X |
| <i>Rhynchosia difformis</i>      | Fabaceae         | Perennial                 | Forb/herb/Vine          | Y | N |                     |   |   | X |
| <i>Rhynchosia michauxii</i>      | Fabaceae         | Perennial                 | Vine                    | Y | N |                     |   |   | X |
| <i>Rhynchosia minima</i>         | Fabaceae         | Perennial                 | Forb/herb/Subshrub/Vine | Y | N | Gilchrist, Suwannee |   |   | X |
| <i>Richardia brasiliensis</i>    | Rubiaceae        | Annual/Perennial          | Forb/herb               | N | N | Gilchrist, Levy     |   | X | X |
| <i>Rubus cuneifolius</i>         | Rosaceae         | Perennial                 | Subshrub                | Y | N |                     | X | X |   |
| <i>Rubus trivialis</i>           | Rosaceae         | Perennial                 | Subshrub/Vine           | Y | N |                     | X |   |   |
| <i>Rudbeckia hirta</i>           | Asteraceae       | Annual/Biennial/Perennial | Forb/herb               | Y | N |                     |   |   | X |
| <i>Rumex hastatulus</i>          | Polygonaceae     | Perennial                 | Forb/herb               | Y | N |                     | X | X |   |
| <i>Sagittaria graminea</i>       | Alismataceae     | Perennial                 | Forb/herb               | Y | N | *                   |   |   | X |
| <i>Sagittaria kurziana</i>       | Alismataceae     | Perennial                 | Forb/herb               | Y | N |                     |   | X | X |
| <i>Salvia lyrata</i>             | Lamiaceae        | Perennial                 | Forb/herb               | Y | N |                     |   |   | X |
| <i>Scoparia dulcis</i>           | Plantaginaceae   | Annual/Perennial          | Forb/herb/Subshrub      | Y | N |                     |   |   | X |
| <i>Scutellaria integrifolia</i>  | Lamiaceae        | Perennial                 | Forb/herb               | Y | N |                     |   |   | X |
| <i>Serenoa repens</i>            | Arecaceae        | Perennial                 | Shrub/Tree              | Y | N |                     |   | X |   |
| <i>Sericocarpus tortifolius</i>  | Asteraceae       | Perennial                 | Forb/herb               | Y | N |                     |   |   | X |
| <i>Sida rhombifolia</i>          | Malvaceae        | Annual/Perennial          | Forb/herb/Subshrub      | Y | N | Gilchrist           |   | X | X |



|                                |                  |                  |                    |   |   |                     |  |   |     |
|--------------------------------|------------------|------------------|--------------------|---|---|---------------------|--|---|-----|
| <i>Sida ulmifolia</i>          | Malvaceae        | Perennial        | Forb/herb/Subshrub | Y | N |                     |  | X | X   |
| <i>Smilax smallii</i>          | Smilacaceae      | Perennial        | Shrub/Vine         | Y | N |                     |  | X |     |
| <i>Solanum chenopodioides</i>  | Solanaceae       | Perennial        | Forb/herb          | Y | N | Gilchrist           |  | X | X   |
| <i>Solidago canadensis</i>     | Asteraceae       | Perennial        | Forb/herb          | Y | N | Gilchrist, Suwannee |  |   | X   |
| <i>Sonchus asper</i>           | Asteraceae       | Annual           | Forb/herb          | N | N |                     |  | X |     |
| <i>Sophronanthe hispida</i>    | Plantaginaceae   | Perennial        | Forb/herb          | Y | N |                     |  | X | X X |
| <i>Spermacoce remota</i>       | Rubiaceae        | Annual/Perennial | Forb/herb/Subshrub | Y | N | Gilchrist           |  |   | X   |
| <i>Spermacoce verticillata</i> | Rubiaceae        | Perennial        | Subshrub           | N | N | Gilchrist           |  | X | X   |
| <i>Stachys floridana</i>       | Lamiaceae        | Perennial        | Forb/herb          | Y | N |                     |  | X | X   |
| <i>Stillingia sylvatica</i>    | Euphorbiaceae    | Perennial        | Forb/herb          | Y | N |                     |  | X |     |
| <i>Stylisma patens</i>         | Convolvulaceae   | Perennial        | Forb/herb/Vine     | Y | N | *                   |  | X | X   |
| <i>Symphotrichum walteri</i>   | Asteraceae       | Perennial        | Forb/herb          | Y | N | Gilchrist           |  |   | X   |
| <i>Tephrosia chrysophylla</i>  | Fabaceae         | Perennial        | Forb/herb          | Y | N |                     |  |   | X   |
| <i>Tephrosia spicata</i>       | Fabaceae         | Perennial        | Forb/herb          | Y | N | Gilchrist           |  |   | X   |
| <i>Thlaspi arvense</i>         | Brassicaceae     | Annual           | Forb/herb          | N | N | Gilchrist           |  | X |     |
| <i>Trichostema dichotomum</i>  | Lamiaceae        | Annual           | Forb/herb          | Y | N |                     |  |   | X   |
| <i>Trichostema setaceum</i>    | Lamiaceae        | Annual           | Forb/herb          | Y | N | Suwannee            |  |   | X   |
| <i>Utricularia subulata</i>    | Lentibulariaceae | Annual/Perennial | Forb/herb          | Y | N | Gilchrist           |  | X | X   |
| <i>Vaccinium arboreum</i>      | Ericaceae        | Perennial        | Shrub/Tree         | Y | N |                     |  | X |     |
| <i>Verbena brasiliensis</i>    | Verbenaceae      | Annual           | Forb/herb/Subshrub | N | N |                     |  | X | X X |
| <i>Verbena halei</i>           | Verbenaceae      | Perennial        | Forb/herb/Subshrub | Y | N | Gilchrist           |  | X | X X |
| <i>Vernonia gigantea</i>       | Asteraceae       | Perennial        | Forb/herb          | Y | N |                     |  |   | X X |
| <i>Veronica arvensis</i>       | Plantaginaceae   | Annual           | Forb/herb          | N | N |                     |  | X |     |
| <i>Veronica peregrina</i>      | Plantaginaceae   | Annual           | Forb/herb          | Y | N | Gilchrist           |  |   | X   |

|                               |               |           |                |    |    |           |   |   |   |
|-------------------------------|---------------|-----------|----------------|----|----|-----------|---|---|---|
| <i>Vicia sativa</i>           | Fabaceae      | Annual    | Forb/herb/Vine | N  | N  | Gilchrist | X |   |   |
| <i>Vitis cinerea</i>          | Vitaceae      | Perennial | Vine           | Y  | N  | Gilchrist |   | X |   |
| <i>Vitis rotundifolia</i>     | Vitaceae      | Perennial | Vine           | Y  | N  | Gilchrist |   | X |   |
| <i>Wahlenbergia marginata</i> | Campanulaceae | Perennial | Forb/herb      | N  | N  | Gilchrist | X | X |   |
| <i>Xyris fimbriata</i>        | Xyridaceae    | Perennial | Forb/herb      | Y  | N  | Levy      | X | X | X |
| Unknown.G5.1                  | NA            | NA        | NA             | NA | NA | NA        |   |   | X |

---
