# Supplementary material for: Integrated vegetation management within electrical transmission landscapes promotes floral resource and flower-visiting insect diversity
Source: PubMed Central journal article supplement (PMC11338444; doi:10.1371/journal.pone.0308263), 2024-08-21
Supplement: pone.0308263.s005.pdf [file pone.0308263.s005.pdf]

# **Integrated vegetation management within electrical transmission landscapes promotes floral resource and flower-visiting insect diversity**

Chase B. Kimmel<sup>1\*</sup>, Ivone de Bem Oliveira<sup>1</sup>, Joshua W. Campbell<sup>1,2</sup>, Emily Khazan<sup>1</sup>, Jonathan S. Bremer<sup>1,3</sup>, Kristin Rossetti<sup>1</sup>, Matthew Standridge<sup>1</sup>, Tyler J. Shaw<sup>1</sup>, Samm Epstein<sup>1</sup>, Alexandra Tsalickis<sup>1,4</sup>, and Jaret C. Daniels<sup>1,5</sup>

<sup>1</sup> McGuire Center for Lepidoptera and Biodiversity, Florida Museum of Natural History, University of Florida, Gainesville, Florida, United States of America

<sup>2</sup> United States Department of Agriculture Agricultural Research Service Northern Plains Agricultural Research Laboratory, Sidney, Montana, United States of America

<sup>3</sup> Florida Department of Agriculture and Consumer Services, Division of Plant Industry, Entomology Section, Gainesville, Florida, United States of America

<sup>4</sup> Department of Geosciences, Auburn University, Auburn, Alabama, United States of America

<sup>5</sup> Department of Entomology and Nematology, University of Florida, Gainesville, Florida, United States of America

\* Corresponding author  
E-mail: cbkimmel@ufl.edu (CBK)

**S2 Table. Parameter summary table for plant and flower-visitors.** Minimum, maximum, average (lsmean), standard error, and significance observed for abundance and richness for the analysis of all plant and all flower-visitors data across the three management treatments (i.e., high, mid, and low management). This table corresponds with Fig 2 in the manuscript. Letters indicating statistical differences based on post hoc tests assuming Sidak correction for multiple comparisons. Confidence level used: 0.95, significance level used:  $\sigma = 0.05$  (a>b>c).

| Group               | Parameter | Treatment | Min   | Max    | Lsmean (sig.*) | Standard Error |
|---------------------|-----------|-----------|-------|--------|----------------|----------------|
| All Flowers         | Abundance | High      | 33.11 | 465.36 | 214.75 (a)     | 7.66           |
|                     |           | Mid       | 8.11  | 314.87 | 147.41 (b)     | 8.04           |
|                     |           | Low       | 18.77 | 267.58 | 134.22 (b)     | 8.04           |
|                     | Richness  | High      | 1.01  | 8.73   | 4.02 (a)       | 0.12           |
|                     |           | Mid       | 0.72  | 5.67   | 3.07 (b)       | 0.13           |
|                     |           | Low       | 0.80  | 7.46   | 3.82 (a)       | 0.13           |
| All Flower-Visitors | Abundance | High      | 10.54 | 54.70  | 27.53 (a)      | 0.73           |
|                     |           | Mid       | 5.05  | 40.39  | 17.13 (b)      | 0.72           |
|                     |           | Low       | 3.30  | 29.03  | 11.91 (c)      | 0.72           |
|                     | Richness  | High      | 2.09  | 10.44  | 5.42 (a)       | 0.10           |
|                     |           | Mid       | 2.67  | 7.71   | 4.37 (b)       | 0.09           |
|                     |           | Low       | 2.38  | 6.40   | 3.88 (c)       | 0.09           |
