# Supplementary material for: Integrated vegetation management within electrical transmission landscapes promotes floral resource and flower-visiting insect diversity
Source: PubMed Central journal article supplement (PMC11338444; doi:10.1371/journal.pone.0308263), 2024-08-21
Supplement: pone.0308263.s006.pdf [file pone.0308263.s006.pdf]

# **Integrated vegetation management within electrical transmission landscapes promotes floral resource and flower-visiting insect diversity**

Chase B. Kimmel<sup>1\*</sup>, Ivone de Bem Oliveira<sup>1</sup>, Joshua W. Campbell<sup>1,2</sup>, Emily Khazan<sup>1</sup>, Jonathan S. Bremer<sup>1,3</sup>, Kristin Rossetti<sup>1</sup>, Matthew Standridge<sup>1</sup>, Tyler J. Shaw<sup>1</sup>, Samm Epstein<sup>1</sup>, Alexandra Tsalickis<sup>1,4</sup>, and Jaret C. Daniels<sup>1,5</sup>

<sup>1</sup> McGuire Center for Lepidoptera and Biodiversity, Florida Museum of Natural History, University of Florida, Gainesville, Florida, United States of America

<sup>2</sup> United States Department of Agriculture Agricultural Research Service Northern Plains Agricultural Research Laboratory, Sidney, Montana, United States of America

<sup>3</sup> Florida Department of Agriculture and Consumer Services, Division of Plant Industry, Entomology Section, Gainesville, Florida, United States of America

<sup>4</sup> Department of Geosciences, Auburn University, Auburn, Alabama, United States of America

<sup>5</sup> Department of Entomology and Nematology, University of Florida, Gainesville, Florida, United States of America

\* Corresponding author  
E-mail: cbkimmel@ufl.edu (CBK)

**S3 Table. Parameter summary table for flower-visitor insect groups.** Minimum, maximum, average (lsmean), standard error, and significance observed for abundance and richness for five flower-visiting insect groups across the three management treatments (i.e., high, mid, and low management). This table corresponds to Fig 4 in the manuscript. Letters indicating statistical differences based on post hoc tests assuming Sidak correction for multiple comparisons. Confidence level used: 0.95, significance level used:  $\sigma = 0.05$  (a>b>c).

| Parameter | Treatment | Flower-visitor Group | Min  | Max   | Lsmean (sig.*) | Standard Error |
|-----------|-----------|----------------------|------|-------|----------------|----------------|
| Abundance | High      | Bee                  | 5.02 | 36.88 | 12.56 (a)      | 0.46           |
|           | Mid       |                      | 1.85 | 24.15 | 6.74 (b)       | 0.45           |
|           | Low       |                      | 1.82 | 20.59 | 5.87 (b)       | 0.45           |
|           | High      | Wasp                 | 2.06 | 4.24  | 2.99 (a)       | 0.03           |
|           | Mid       |                      | 1.10 | 2.37  | 1.63 (b)       | 0.03           |
|           | Low       |                      | 0.77 | 1.88  | 1.19 (c)       | 0.03           |
|           | High      | Beetle               | 1.36 | 15.24 | 6.25 (a)       | 0.24           |
|           | Mid       |                      | 0.76 | 11.98 | 4.25 (b)       | 0.23           |
|           | Low       |                      | 0.43 | 11.07 | 3.39 (c)       | 0.23           |
|           | High      | Butterfly/Moth       | 0.25 | 2.73  | 1.21 (a)       | 0.04           |
|           | Mid       |                      | 0.15 | 1.29  | 0.59 (b)       | 0.04           |
|           | Low       |                      | 0.10 | 1.58  | 0.61 (b)       | 0.04           |
|           | High      | Fly                  | 0.15 | 22.80 | 3.91 (a)       | 0.34           |
|           | Mid       |                      | 0.14 | 18.44 | 3.63 (a)       | 0.33           |
|           | Low       |                      | 0.03 | 5.78  | 1.13 (b)       | 0.33           |
| Richness  | High      | Bee                  | 0.88 | 2.01  | 1.35 (a)       | 0.02           |
|           | Mid       |                      | 0.87 | 1.80  | 1.22 (c)       | 0.01           |
|           | Low       |                      | 0.94 | 1.97  | 1.29 (b)       | 0.01           |
|           | High      | Wasp                 | 0.48 | 3.37  | 1.60 (a)       | 0.03           |
|           | Mid       |                      | 0.43 | 2.39  | 1.11 (b)       | 0.03           |
|           | Low       |                      | 0.49 | 1.67  | 0.88 (c)       | 0.03           |
|           | High      | Beetle               | 0.30 | 4.15  | 1.36 (a)       | 0.05           |
|           | Mid       |                      | 0.40 | 3.11  | 1.26 (a)       | 0.05           |
|           | Low       |                      | 0.36 | 2.46  | 1.08 (b)       | 0.05           |
|           | High      | Butterfly/Moth       | 0.22 | 0.95  | 0.52 (a)       | 0.01           |
|           | Mid       |                      | 0.18 | 0.74  | 0.41 (b)       | 0.01           |
|           | Low       |                      | 0.16 | 0.67  | 0.38 (b)       | 0.01           |
|           | High      | Fly                  | 0.14 | 1.00  | 0.47 (a)       | 0.02           |
|           | Mid       |                      | 0.13 | 0.90  | 0.42 (a)       | 0.02           |
|           | Low       |                      | 0.10 | 0.70  | 0.32 (b)       | 0.02           |
